# Supplementary material
Source: PubMed Central journal article supplement (PMC6264797)
Supplement: NIHMS991156-supplement-1.pdf [file NIHMS991156-supplement-1.pdf]

**Molecular Cell, Volume 71**

**Supplemental Information**

**Genome-wide Map of R-Loop-Induced  
Damage Reveals How a Subset of R-Loops  
Contributes to Genomic Instability**

**Lorenzo Costantino and Douglas Koshland**

Supplementary Materials for  
**Genome-wide map of R-loop induced damage reveals how a subset of R-loops contribute to genomic instability**

Lorenzo Costantino, Douglas Koshland

correspondence to: L.C.: [Lorenzo.Costantino@gmail.com](mailto:Lorenzo.Costantino@gmail.com), D.K.: [koshland@berkeley.edu](mailto:koshland@berkeley.edu)

**This PDF file includes:**

Figs. S1 to S7  
Tables S1 to S2

**Fig. S1**

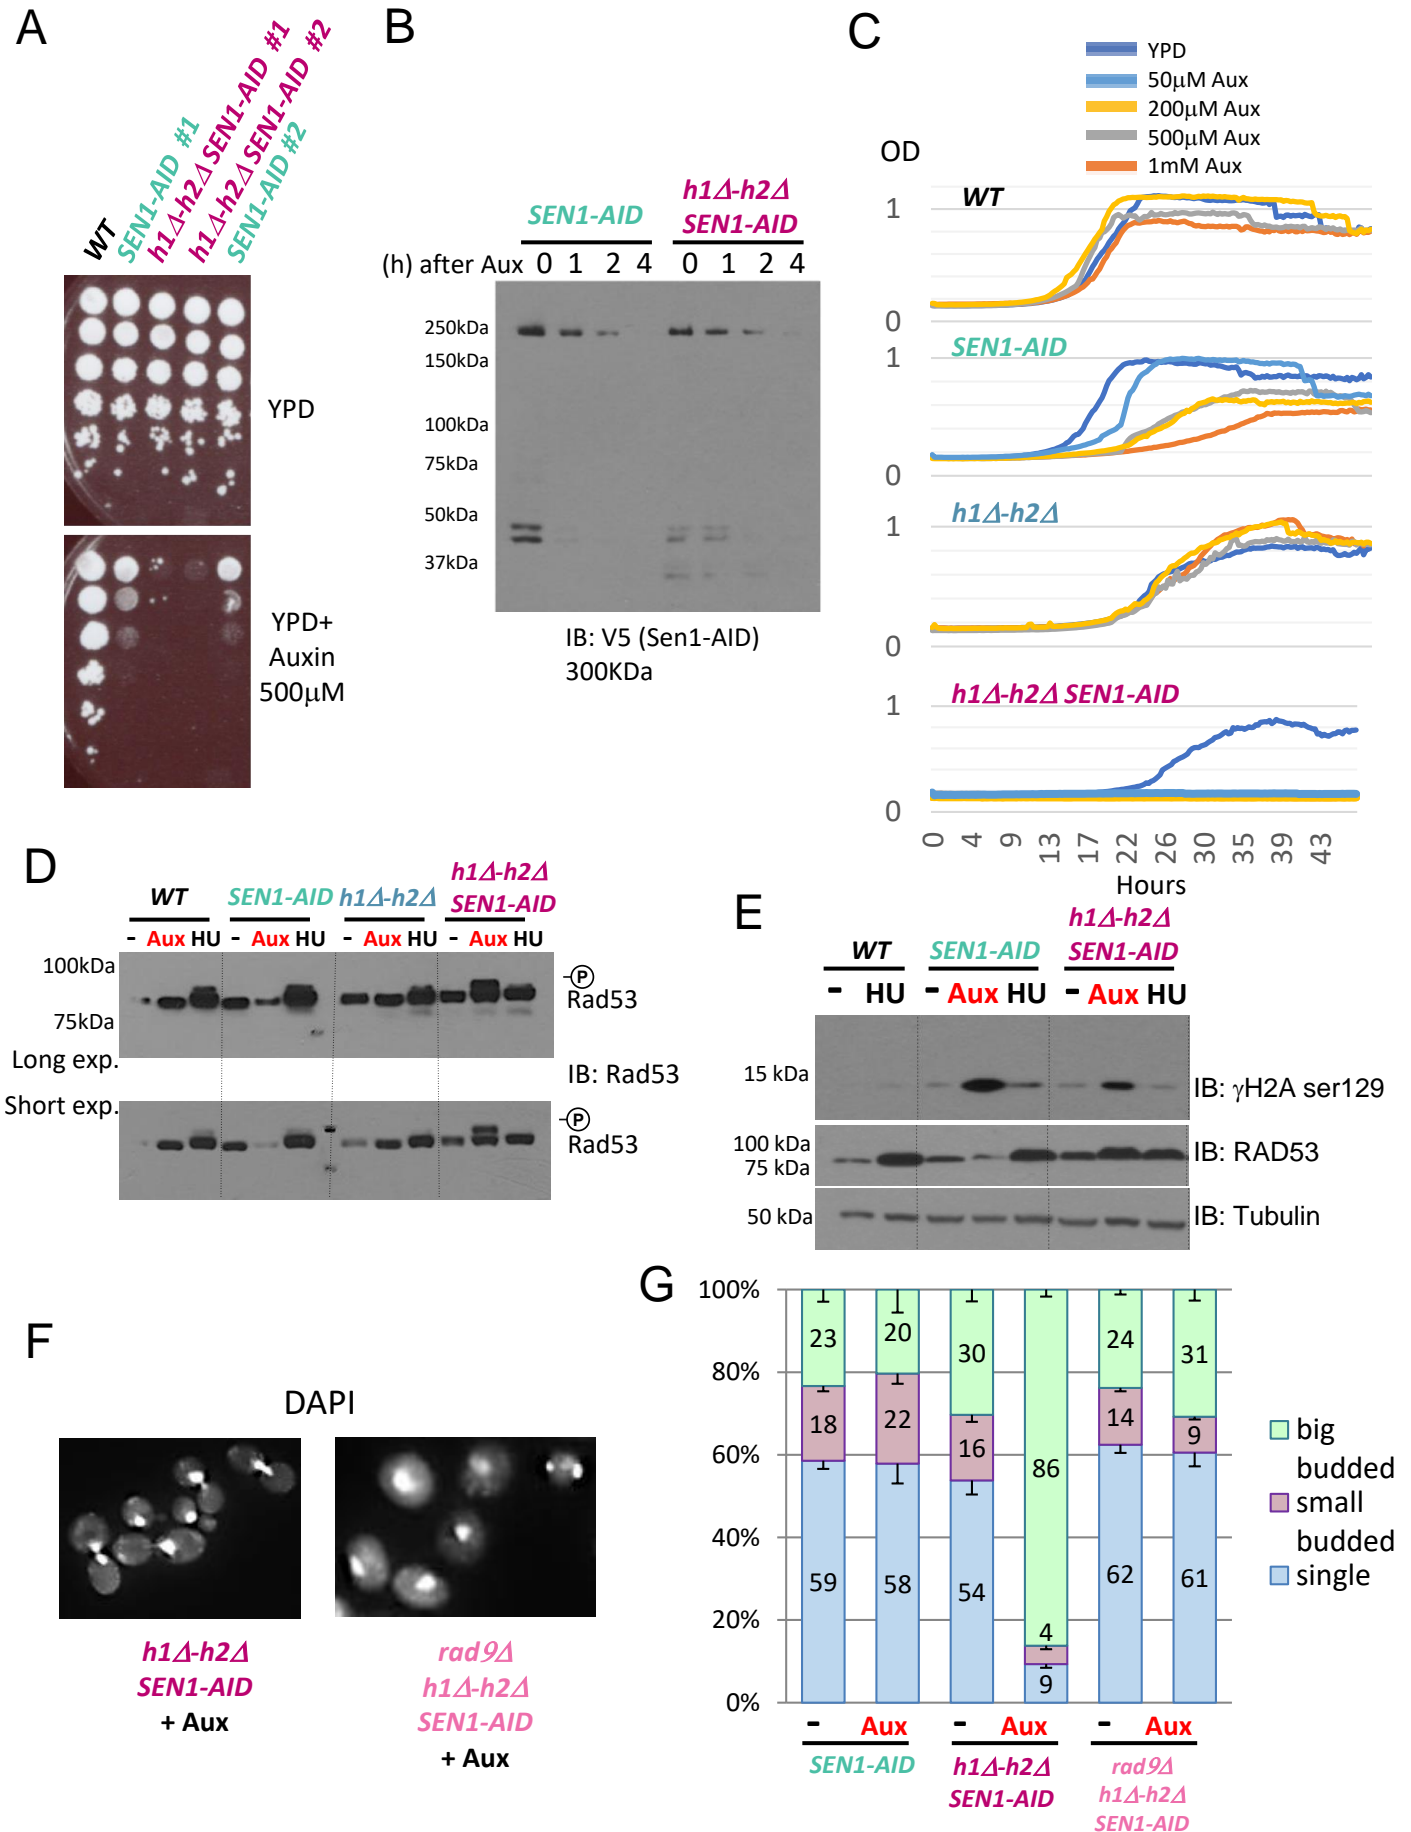

**Figure S1. Related to Figure 1. SEN1-AID depletion in *h1Δ-h2Δ* accumulates DNA damage, activates DNA damage checkpoint and cell cycle arrest**

**(A)** Dilution plating assays of asynchronous cultures of wild-type (*WT*), two different isolates of Sen1 with auxin-inducible degron (*SEN1-AID*) and two different isolates of Sen1 with auxin-inducible degron with deletion of the two RNases-H, RNH1 and RNH201 (*h1Δ-h2Δ SEN1-AID*). Ten-fold serial dilutions of cells were plated on YPD and YPD with 500mM auxin. Depletion of the essential Sen1 alone slows down growth on auxin, while Sen1 depletion in an RNases-H deletion background completely abolishes growth.

**(B)** Asynchronous cultures of *SEN1-AID* and *h1Δ-h2Δ SEN1-AID* were treated for the indicated time with 500mM auxin (Aux). Western-blot was performed using a anti-V5 antibody for Sen1-AID tagged with V5. Sen1-AID was not detectable after 4h auxin treatment.

**(C)** Asynchronous cultures of wild-type *WT*, *SEN1-AID*, RNases-H deletion, RNH1 and RNH201 (*h1Δ-h2Δ*), and *h1Δ-h2Δ SEN1-AID* were seeded on YPD media with the indicated auxin concentration and growth at 23°C. Growth was followed measuring the OD=600 every 10' in TECAN Spark microplate reader. Sen1-AID grows slower at high concentration of auxin, while *h1Δ-h2Δ SEN1-AID* growth is completely arrested even at the lowest auxin concentration.

**(D)** Asynchronous culture *WT*, *SEN1-AID*, *h1Δ-h2Δ*, and *h1Δ-h2Δ SEN1-AID* were left untreated (-), or treated for 4h with 500mM auxin (Aux), or 25mM hydroxyurea (HU) for 2h. Western-blot was performed using an anti-Rad53 antibody. Low doses of HU triggers a small amount of phosphorylated-Rad53 (upper band) in every strain, while auxin triggers a robust Rad53-phosphorylation only in *h1Δ-h2Δ SEN1-AID*.

**(E)** Asynchronous culture of *WT*, *SEN1-AID*, and *h1Δ-h2Δ SEN1-AID* were left untreated (-), or treated for 4h with 500mM auxin (Aux), or 25mM hydroxyurea (HU) for 2h. Western-blot was performed using an antibody for phosphorylated Ser129 H2A, anti-Rad53, tubulin for loading control. Sen1-AID depletion triggers phosphorylation of H2A.

**(F)** Asynchronous cultures of *h1Δ-h2Δ SEN1-AID* and *Rad9Δ h1Δ-h2Δ SEN1-AID* were treated for 4h with 500mM auxin (Aux). Cells were fixed, DNA was stained with DAPI and pictures were acquired with a microscope. A G2/M arrest is observed as large-budded cells with DNA in the neck of the dividing cells in *h1Δ-h2Δ SEN1-AID*. The arrest is abolished when Rad9 is deleted in *Rad9Δ h1Δ-h2Δ SEN1-AID*.

**(G)** Cell morphology of 100 cells for was quantified. *SEN1-AID*, *h1Δ-h2Δ SEN1-AID* and Sen1 with auxin-inducible degron with deletion of the two RNases-H, RNH1 and RNH201 in Rad9 deletion strain (*Rad9Δ h1Δ-h2Δ SEN1-AID*). The G2/M arrest of *h1Δ-h2Δ SEN1-AID* strain treated with auxin is abolished when Rad9 is deleted in *Rad9Δ h1Δ-h2Δ SEN1-AID*.

**Fig. S2**

**A**

Survival rate after transient Sen1 depletion

| Auxin                         | 0h   | 5h  | 8h  |
|-------------------------------|------|-----|-----|
| <i>WT</i>                     | 100% | 98% | 97% |
| <i>SEN1-AID</i>               | 95%  | 89% | 87% |
| <i>h1Δ-h2Δ</i>                | 95%  | 90% | 89% |
| <i>h1Δ-h2Δ SEN1-AID</i>       | 93%  | 13% | 7%  |
| <i>rad9Δ h1Δ-h2Δ SEN1-AID</i> | 92%  | 9%  | 4%  |

**B**

Colony formation rates on Auxin plates

|                               | YPD  | YPD + Auxin |
|-------------------------------|------|-------------|
| <i>WT</i>                     | 100% | 98%         |
| <i>SEN1-AID</i>               | 94%  | 0%          |
| <i>h1Δ-h2Δ</i>                | 97%  | 93%         |
| <i>h1Δ-h2Δ SEN1-AID</i>       | 92%  | 0%          |
| <i>rad9Δ h1Δ-h2Δ SEN1-AID</i> | 86%  | 0%          |

Day 3

|                               | YPD  | YPD + Auxin |
|-------------------------------|------|-------------|
| <i>WT</i>                     | 100% | 98%         |
| <i>SEN1-AID</i>               | 94%  | 92%         |
| <i>h1Δ-h2Δ</i>                | 97%  | 93%         |
| <i>h1Δ-h2Δ SEN1-AID</i>       | 92%  | 0%          |
| <i>rad9Δ h1Δ-h2Δ SEN1-AID</i> | 86%  | 0%          |

Day 10

**C**

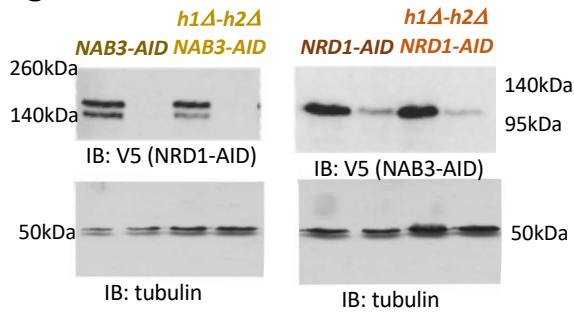

**D**

Survival rate after transient NRD1 and NAB3 depletion

| Auxin                   | 0h   | 5h  | 8h  |
|-------------------------|------|-----|-----|
| <i>WT</i>               | 100% | 98% | 97% |
| <i>NAB3-AID</i>         | 96%  | 95% | 94% |
| <i>h1Δ-h2Δ NAB3-AID</i> | 94%  | 91% | 90% |
| <i>NRD1-AID</i>         | 95%  | 93% | 92% |
| <i>h1Δ-h2Δ NRD1-AID</i> | 93%  | 91% | 89% |

**E**

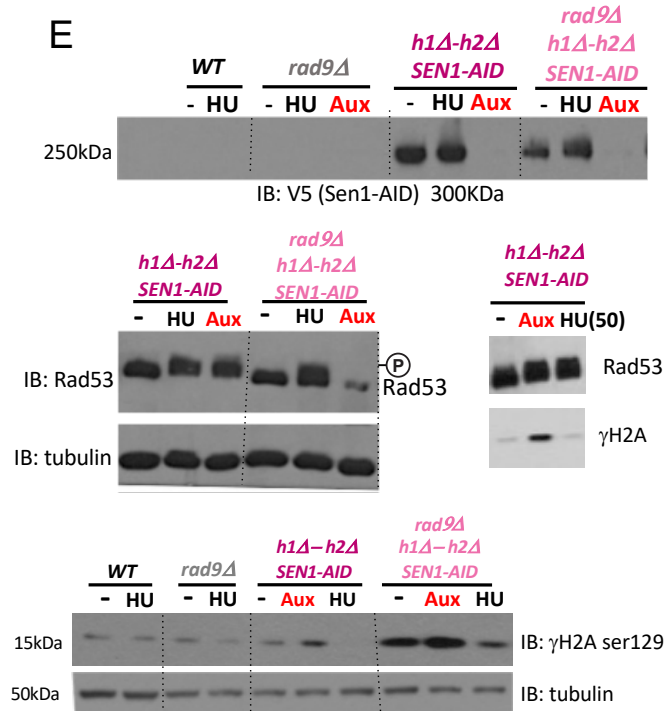

**Figure S2. Related to Figure 2. Auxin treated *h1Δ-h2Δ SEN1-AID* cells accumulate irreparable damage leading to cell death.**

**(A)** Asynchronous culture of WT, Sen1 with auxin-inducible degenon (*SEN1-AID*), deletion of the two RNases-H, RNH1 and RNH201 (*h1Δ-h2Δ*), Sen1 with auxin-inducible degenon with deletion of the two RNases-H, RNH1 and RNH201 (*h1Δ-h2Δ SEN1-AID*), and Sen1 with auxin-inducible degenon with deletion of the two RNases-H, RNH1 and RNH201 in Rad9 deletion strain (*Rad9Δ h1Δ-h2Δ SEN1-AID*) were treated for the indicated time with 500μM auxin (Aux). Cells were counted and plated on YPD plates without auxin. Survival rates after transient Sen1-Aid depletion was assessed by scoring colony-forming units. *h1Δ-h2Δ SEN1-AID* and *Rad9Δ h1Δ-h2Δ SEN1-AID* viability was affected by Sen1-AID depletion.

**(B)** Asynchronous strains in (A) were left untreated, counted and plated directly on YPD plate or YPD plate with 500μM auxin. *SEN1-AID* strain did not form detectable colonies by day 3, but formed colonies by day 10, due to slow growth of this strain in auxin. No colonies were observed in *h1Δ-h2Δ SEN1-AID* nor in *Rad9Δ h1Δ-h2Δ SEN1-AID* strains.

**(C)** Asynchronous cultures of Nab3 with auxin-inducible degenon (*NAB3-AID*), Nab3 with auxin-inducible degenon with deletion of the two RNases-H, RNH1 and RNH201 (*h1Δ-h2Δ NAB3-AID*), Nrd1 with auxin-inducible degenon (*NRD1-AID*) and Nrd1 with auxin-inducible degenon with deletion of the two RNases-H, RNH1 and RNH201 (*h1Δ-h2Δ NRD1-AID*) were treated for 4h with 500μM auxin. Western-blot was performed using an anti-V5 antibody for Nab1-AID tagged with V5 (left panels) or Nab1-AID tagged with V5 (right panels). Tubulin was used as loading control. Nab3-AID was not detectable, while Nrd1-AID was heavily reduced after 4h auxin treatment.

**(D)** Asynchronous culture as in (A) were treated for the indicated time with 500μM auxin (Aux). Cells were counted and plated on YPD plates without auxin. Survival rate was scored as colony-forming units and was not affected in any strain. Differently from transient depletion of Sen1, transient depletion of Nab3 and Nrd1 in combination with deletion of the RNases-H is not lethal.

**(E)** Asynchronous culture of WT, *Rad9Δ*, *h1Δ-h2Δ SEN1-AID*, and *Rad9Δ h1Δ-h2Δ SEN1-AID* were left untreated (-), or treated for 4h with 500μM auxin (Aux), or 25mM hydroxyurea (HU) for 2h. Western-blot was performed using an anti-V5 antibody to detect Sen1-AID-V5 levels (first panel). Auxin depletes Sen1-AID in every strain. Western-blot was performed in using anti-Rad53 antibody and tubulin was used as loading control (second panel). Rad53 phosphorylation in *h1Δ-h2Δ SEN1-AID* after auxin is not present in *Rad9Δ h1Δ-h2Δ SEN1-AID* suggesting that Rad9 activated the DNA damage checkpoint after auxin addition resulting in Rad53 phosphorylation. Asynchronous culture of *h1Δ-h2Δ SEN1-AID* left untreated (-), or treated for 4h with 500mM auxin (Aux), or 50mM hydroxyurea (HU) for 2h. Western-blot was performed in using anti-Rad53 and phosphorylated Ser129 H2A antibody (third panel). Western-blot was performed using an antibody for phosphorylated Ser129 H2A, and tubulin as a loading control (forth panel). *Rad9Δ h1Δ-h2Δ SEN1-AID* has higher levels of

gH2A ser129 than *h1Δ -h2Δ SEN1-AID*, suggesting that Rad9 is not required for H2A phosphorylation after auxin treatment.

**Fig. S3**

**A**

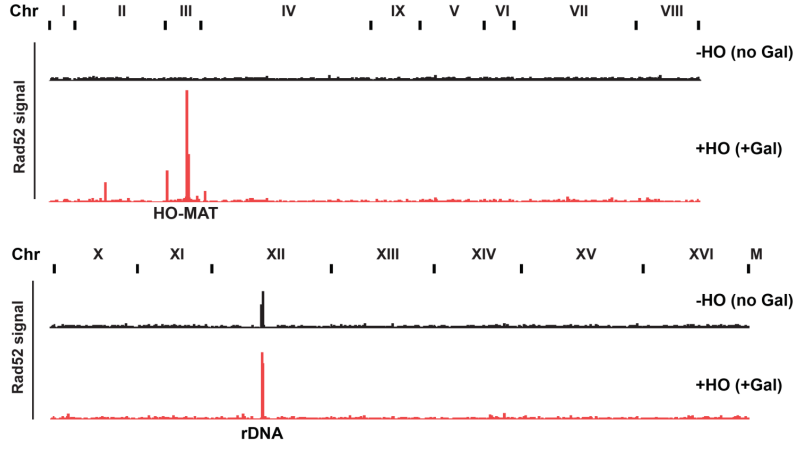

**B**

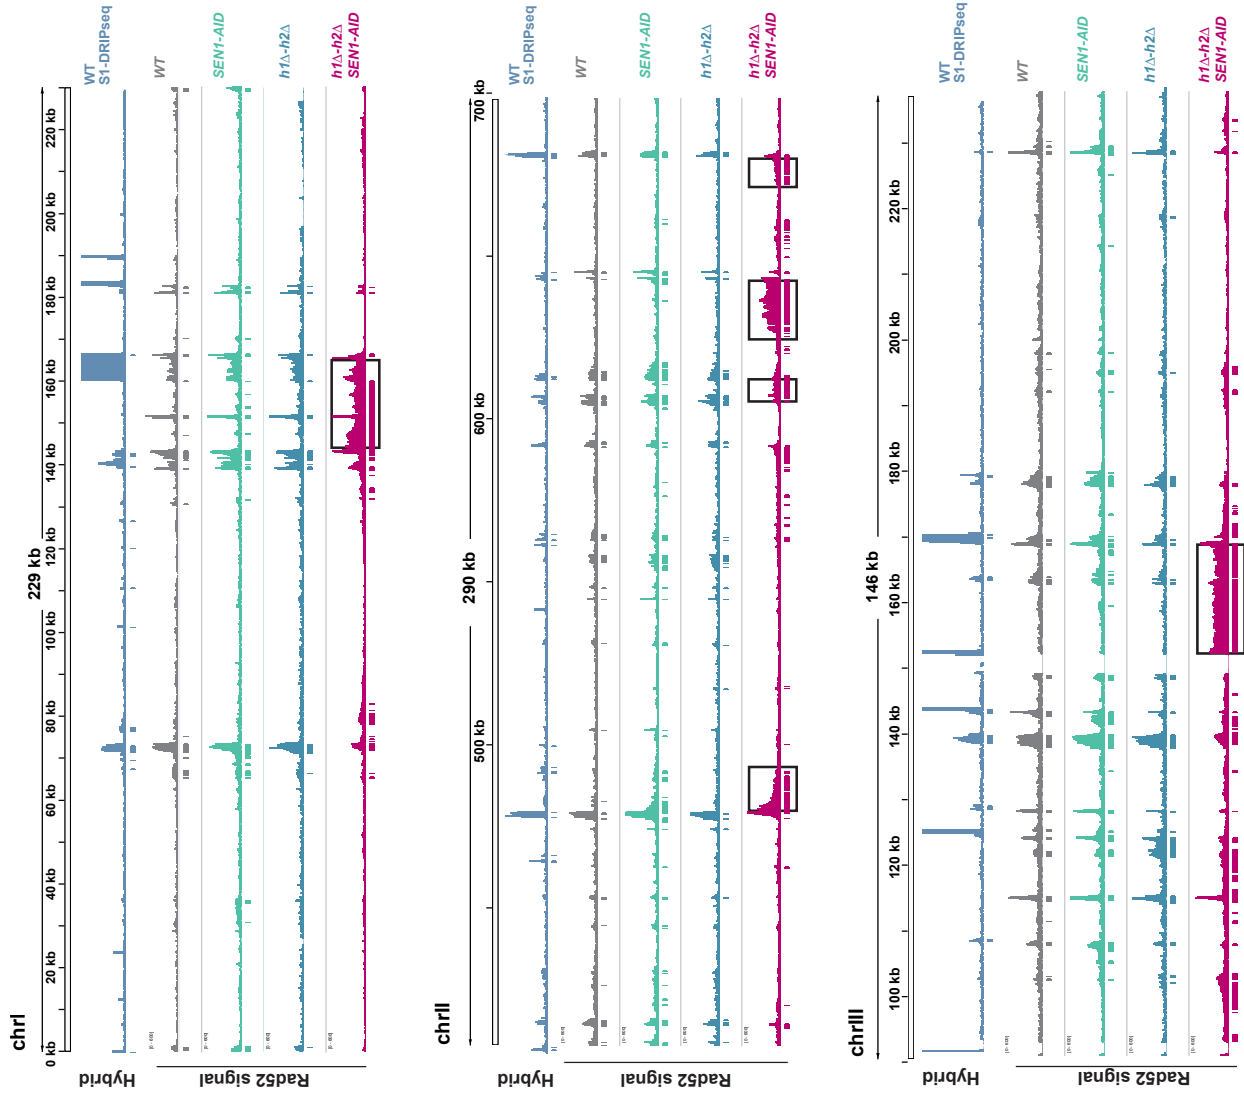



**Figure S3. Related to Figure 3. Rad52ChIP-seq signal after induction of an irreparable DSB and in strains defective for hybrid-removal machinery.**

**(A)** In Gal-HO strain, the expression of HO is induced with 2% galactose for 1.5h. The endonuclease-HO makes a single DSB at the mating-type (HO-MAT) locus. The DSB is not repaired by recombination since the homologous sequences (HML and HMR) have been deleted. The expression of HO is induced with 2% galactose for 1.5h. Cells untreated or treated with galactose were fixed and processed for Rad52-ChIPseq. Rad52 signal from chromosomes 1-9 (top panel) and 10-16 (bottom panel) is indicated with a bar-chart in black for cells not treated (-HO, no DSB), and in red for cells induced with galactose (+HO, one DSB). A major peak signal coming from the HO-MAT is present just in induced cells (red) on chromosome III. A peak from rDNA is present in both not-induced and induced samples, since the rDNA signal is around 75 folds higher than the rest of the genome (the annotated genome used for aligning the sequencing reads has just 2 repeats of rDNA while the genome has around 150 copies).

**(B)** Sequencing signals from chromosome I, II and III are presented with bar-charts, and identified regions of enrichment are shown with underlining boxes. Signal coming from hybrids using published S1-DRIPseq data in a wild type (6) (WT S1-DRIPseq) is in blue (first lane). Signal coming from Rad52 (Rad52-ChIPseq) from wild type (*WT*, grey), *Sen1* with auxin-inducible degron (*SEN1-AID*, green), deletion of the two RNases-H, RNH1 and RNH201 (*h1Δ-h2Δ*, dark blue), and *Sen1* with auxin-inducible degron with deletion of the two RNases-H, RNH1 and RNH201 (*h1Δ-h2Δ SEN1-AID*, purple). All strains were treated with auxin for 4h, to deplete *Sen1-AID* or as a control in *WT*. In *WT*, *SEN1-AID* and *h1Δ-h2Δ* strains, the majority of loci bound by Rad52 co-localized with the positions of R-loops. The new Rad52 regions identified only in *h1Δ-h2Δ SEN1-AID* strain are boxed in black.

**Fig. S4**

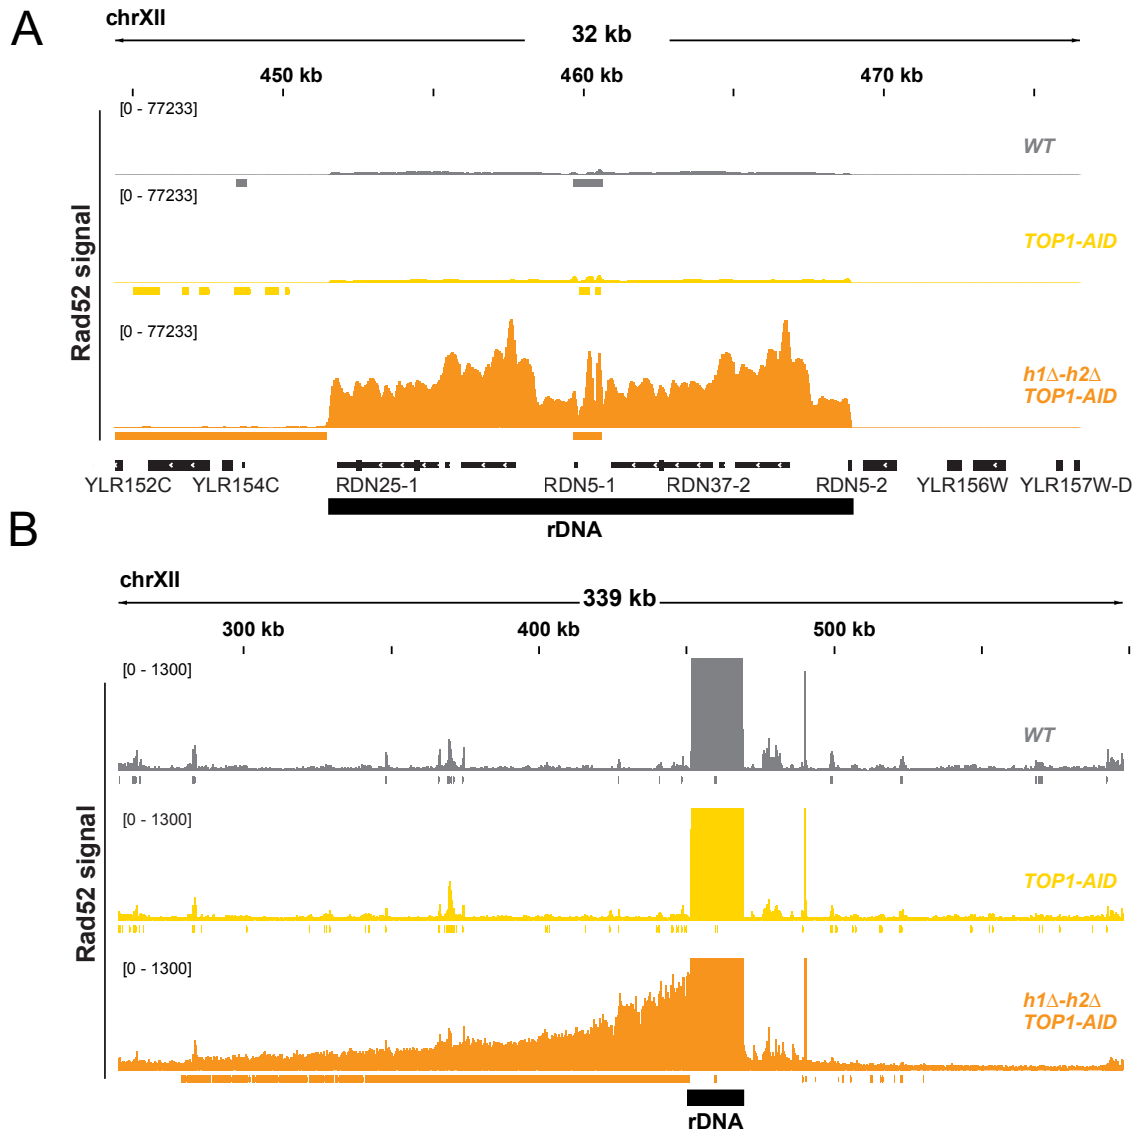

**Figure S4. Related to Figure 4. Rad52ChIP-seq identifies rDNA as region of DNA damage in *h1Δ-h2Δ TOP1-AID***

(A) Rad52-ChIPseq signal from a portion of chromosome XII containing the ribosomal DNA locus (rDNA block box) is presented with bar-charts and identified regions of enrichment are shown with underlining boxes. Signal from Rad52 (Rad52-ChIPseq) from wild type (*WT*, grey), Topoisomerase-I with auxin-inducible degron (*TOP1-AID*, yellow), and Topoisomerase-I with auxin-inducible degron with deletion of the two RNases-H, RNH1 and RNH201 (*h1Δ-h2Δ TOP1-AID*, orange). All strains were treated with auxin for 4h, to deplete Sen1-AID or as a control in *WT*. Rad52-ChIPseq signal from *h1Δ-h2Δ TOP1-AID* presented a 40-fold enrichment in the rDNA locus compared to the other strains.

**(B)** Rad52-ChIPseq signal from a larger portion of chromosome XII containing the rDNA locus (black box). Rad52 signal from strains as in (A). The signal on the repetitive rDNA locus is around 75-folds higher than the one from unique regions; because the reference genome used in the alignment has just 2 rDNA copies while cells possess around 150 copies. So, by lowering the maximum signal by around 75 folds and showing a larger portion of the chromosome XII with the unique sequence flanking the rDNA, we detected Rad52 signal in around 150kb on the left side of the rDNA. In conclusion *h1Δ-h2Δ* *TOP1- AID* presents the new Rad52 signal in the rDNA and in the 150kb on the flanking left unique region.

**Fig. S5**

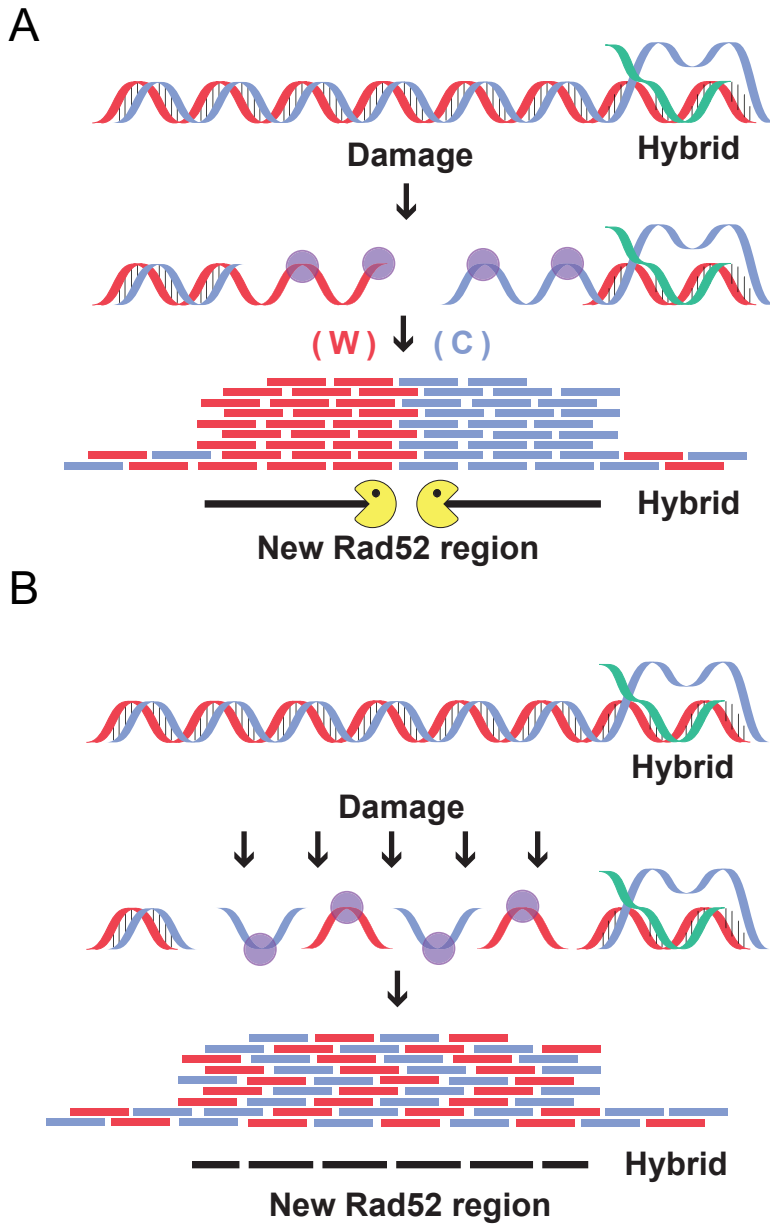

**Figure S5. Related to Figure 6. Model for hybrid-induced damage originating from processing of “classical” double strand break.**

(A) Expected strand specific reads for hybrid-induced damage with a single double strand break (DSB) in the same location in every cell. This DSB will be resected 5'-3' on both ends, leaving a Watson (red) ssDNA on the left side of the break and a Crick (blue) on the right side. Rad52 coats the ssDNA on both sides of the DSB, resulting in a distinct Rad52-ChIPseq signal from the Watson strand (red bricks) on one side, and from the Crick strand (blue bricks) on the other side, exactly as observed for HO DSB.

**(B)** Expected strand specific reads for hybrid-induced damage a single double strand break (DSB) at a different location in each cell. This DSB will be resected 5'-3'. The fact that every cell experiences the damage in a slightly different location within the new Rad52 region, will produce a mix of the Watson strand (red bricks) and the Crick strand (blue bricks) signal.

Fig. S6

A

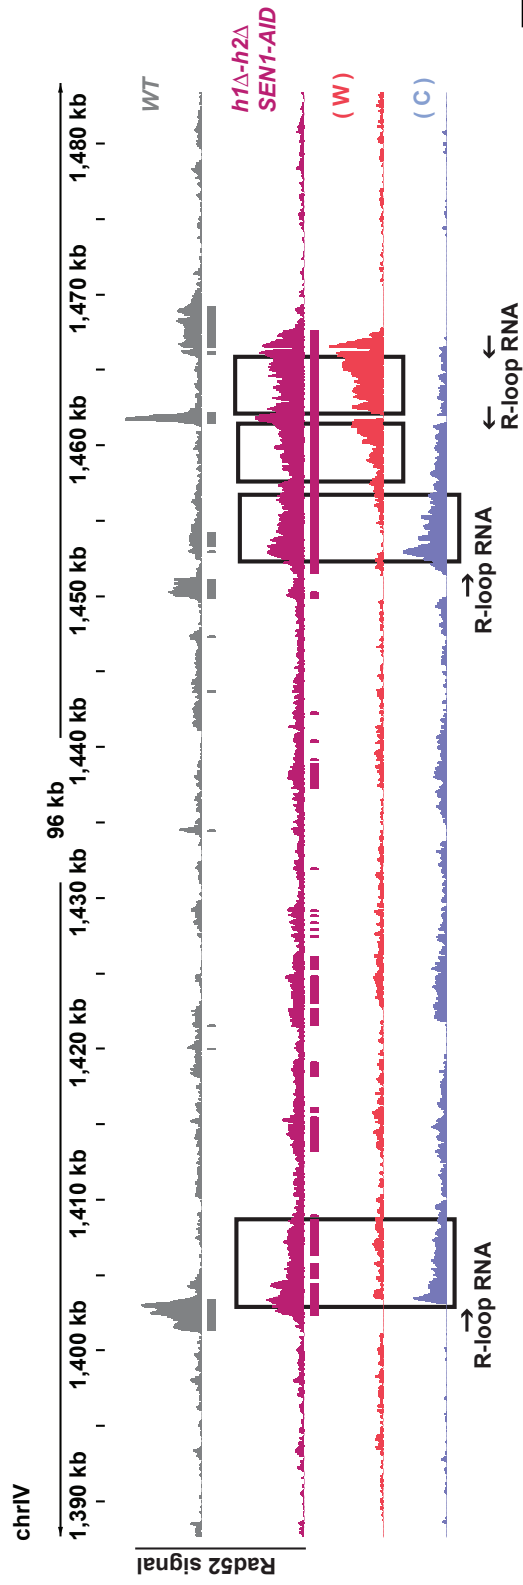

B

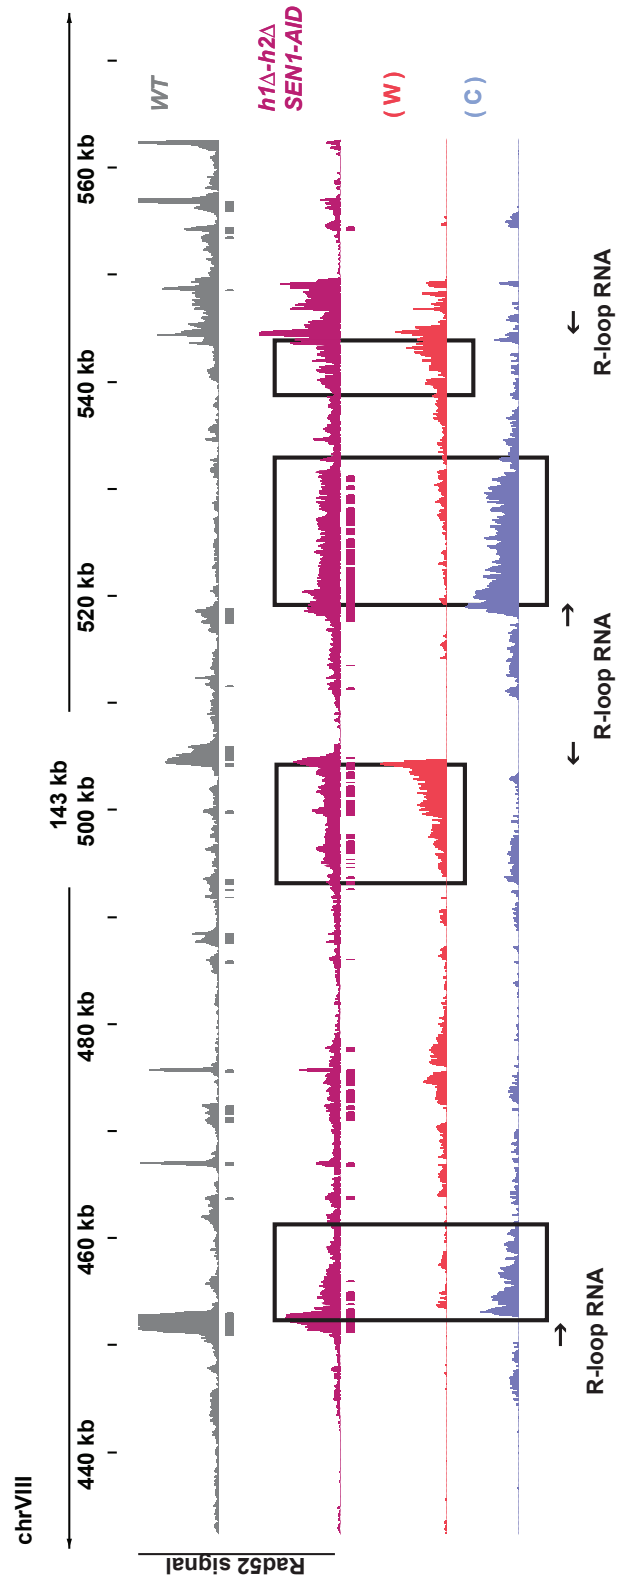

**Fig. S6. Related to Figure 6. Regions of DNA damage in *h1Δ-h2Δ SEN1-AID* present a unique strand-signature of Rad52-ChIPseq signal**

(A) Rad52-ChIPseq signal from a portion of chromosome IV is presented as bar-charts and identified regions of enrichment are shown with underlining boxes. Signal coming from Rad52 (Rad52-ChIPseq) from wild type (*WT*, grey), and Sen1 with auxin-inducible degron with deletion of the two RNases-H, RNH1 and RNH201 (*h1Δ-h2Δ SEN1-AID*, purple). All strains were treated with auxin for 4h, to deplete Sen1-AID or as control in *WT*. The extra Rad52 signal present in *h1Δ-h2Δ SEN1-AID* versus *WT* coming from the Watson strand (W, red), and coming from the Crick strand (C, blue). The signal of the new Rad52 regions present in *h1Δ-h2Δ SEN1-AID* (boxed in black) are originated mainly from one of the two strands, and the associated R-loop is indicated with an arrow following the direction of transcription.

(B) Rad52-ChIPseq signal from a portion of chromosome VII with same strains as in (A)

**Fig.S7**

**A**

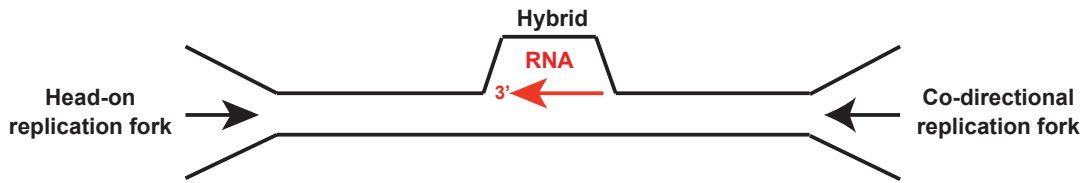

**B**

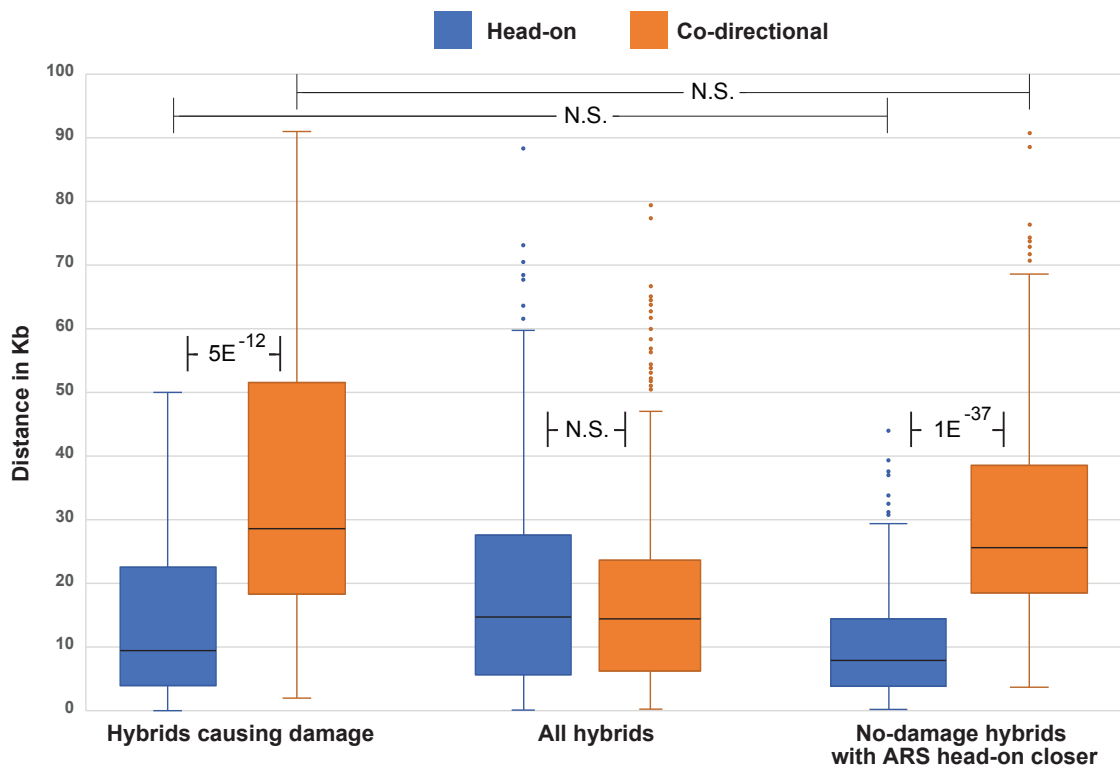

|        | Head-on | Co-dir |
|--------|---------|--------|
| Min    | 30      | 2000   |
| Q1     | 4000    | 18700  |
| Median | 9400    | 28549  |
| Q3     | 22000   | 51000  |
| Max    | 50000   | 91000  |

|        | Head-on | Co-dir |
|--------|---------|--------|
| Min    | 36      | 312    |
| Q1     | 9190    | 10078  |
| Median | 23638   | 23221  |
| Q3     | 44258   | 37821  |
| Max    | 141611  | 127377 |

|        | Head-on | Co-dir |
|--------|---------|--------|
| Min    | 36      | 5061   |
| Q1     | 5171    | 25965  |
| Median | 11025   | 35791  |
| Q3     | 19934   | 53532  |
| Max    | 61569   | 127377 |



**Fig. S7. Related to Figure 6. Distance between hybrid regions in *h1Δ-h2Δ SEN1-AID* and head-on and co-directional replication origins.**

**(A)** Model for head-on and co-directional replication origins. Head-on replication origins will collide head-on with the 3' end of the RNA forming the hybrid. Co-directional replication origins will collide with the 5' of the RNA, in the same direction of the RNA forming the hybrid.

**(B)** The distribution of the distance between the hybrid and the corresponding head-on replication origin (blue) and co-directional origin (orange) is showed using box and whiskers graph (we used the origin of replication dataset from the database of <http://www.oridb.org>). The first and second bars show the distance between the hybrid originating the new Rad52 regions in *h1Δ-h2Δ SEN1-AID* strain and the head-on and co-directional replication origins. 75% of them have a head-on origin closer than the co-directional one. The third and fourth bars show the distance between every hybrid forming regions in the genome that contains a transcript, and the corresponding head-on and co-directional origin of replication. 50% of the hybrids have a head-on replication origin closer than the co-directional one. The fifth and sixth bars show the distance between the hybrids that do not cause damage and contains a transcript (and have a head-on replication origin closer than the co-directional one) with the head-on and co-directional replication origins. The corresponding values are showed below. The statistical significance was calculated using the T-test (T-test value or N.S. for not statistically significant).

**Table S1.**  
Strains table

| <b>Strain name</b> | <b>strain name in paper</b>  | <b>genotype</b>                                                                                 | <b>mating type</b> |
|--------------------|------------------------------|-------------------------------------------------------------------------------------------------|--------------------|
| LC-A01             | WT                           | leu2 his3::TIR1-HI8S3 ura3 TRP1 ade-                                                            | MATa               |
| LC-A02             | SEN1-AID                     | leu2 his3::TIR1-HIS3 ura3 TRP1 ade- SEN1-3xV5-AID-KanMX                                         | MATa               |
| LC-A03             | h1Δ-h2Δ                      | leu2 his3::TIR1-HIS3 ura3 TRP1 ade-rnh1Δ::HYG-B rnh201Δ::CLONAT                                 | MATa               |
| LC-A04             | h1Δ-h2Δ<br>SEN1-AID          | leu2 his3::TIR1-HIS3 ura3 TRP1 ade-rnh1Δ::HYG-B rnh201Δ::CLONAT SEN1-3xV5-AID-KanMX             | MATa               |
| LC-A05             | rad9Δ                        | leu2 his3::TIR1-HIS3 ura3 TRP1 ade- (not red) rad9::LEU2                                        | MATa               |
| LC-A06             | rad9Δ<br>SEN1-AID            | leu2 his3::TIR1-HIS3 ura3 TRP1 ade- (not red) SEN1-3xV5-AID1-KanMX rad9::LEU2                   | MATa               |
| LC-A07             | rad9Δ<br>h1Δ-h2Δ             | leu2 his3::TIR1-HIS3 ura3 TRP1 ade-rnh1Δ::HYG-B rnh201Δ::CLONAT rad9::LEU2                      | MATa               |
| LC-A08             | rad9Δ<br>h1Δ-h2Δ<br>SEN1-AID | leu2 his3::TIR1-HIS3 ura3 TRP1 ade-rnh1Δ::HYG-B rnh201Δ::CLONAT SEN1-3xV5-AID1-KanMX rad9::LEU2 | MATa               |
| LC-A09             | TOP1-AID                     | leu2 his3::TIR1-HIS3 ura3 TRP1 ade- TOP1-3xV5-AID-KanMX                                         | MATa               |
| LC-A10             | h1Δ-h2Δ<br>TOP1-AID          | leu2 his3::TIR1-HIS3 ura3 TRP1 ade-rnh1Δ::HYG-B rnh201Δ::CLONAT TOP1-3V5-AID1-KanMX6            | MATa               |
| Ref.(17)           | Gal-HO                       | Δho Δhml1::ADE1 Δhmr::ADE1 ade1-110 leu2,3-112 lys5 trp1::hisG ura3-52 ade3::GAL10:HO           | MATα               |

**Table S2.**  
Oligos table

|         |                      |
|---------|----------------------|
| Ch1_A_F | ggtagaaccaccgaccaaga |
| Ch1_A_R | tgtcttctccgctcaaact  |
| Ch1_B_F | tatcgccacacgtttctttg |
| Ch1_B_R | agaatggctagcggactgaa |
| Ch1_C_F | tatcgcatggctccagatg  |
| Ch1_C_R | accggatcattgctgaagtc |
| Ch2_A_F | tgaggagactgcagcaagaa |
| Ch2_A_R | ttatatgtggggctggcact |
| Ch2_B_F | tgcaatcagtacgggttctg |
| Ch2_B_R | cgggtccatttcctacttca |
| Ch2_C_F | ggacagattaccacctcca  |
| Ch2_C_R | atattgctgcaccacacaa  |
